1 **Title:**

2

3 A previously missed population of antigen-specific CD8 T cells divides in the blood  
4 after vaccination

5

6 **Authors**

7

8 Sonia Simonetti<sup>1,2,\*§</sup>, Ambra Natalini<sup>1,2§</sup>, Antonella Folgori<sup>3</sup>, Stefania Capone<sup>3</sup>,  
9 Alfredo Nicosia<sup>3</sup>, Angela Santoni<sup>1,2,4</sup>, Francesca Di Rosa<sup>1</sup>

10

11 1 Institute of Molecular Biology and Pathology, National Research Council (CNR),  
12 Rome, Italy

13 2 Department of Molecular Medicine, University of Rome “Sapienza”, Rome, Italy

14 3 Reithera, Rome, Italy

15 4 Istituto Pasteur Italia – Fondazione Cenci Bolognetti, Rome, Italy

16

17 \* current affiliation: Translational Oncology Laboratory, Campus Bio-Medico  
18 University, Rome, Italy

19

20 § these authors contributed equally to the work

21

22

23

24 **Corresponding Author**

25

26 Francesca Di Rosa,

27 Institute of Molecular Biology and Pathology,

28 Consiglio Nazionale delle Ricerche, Rome, Italy

29 c/o Department of Molecular Medicine

30 Sapienza University, viale Regina Elena 291, Rome 00161, Italy

31 Te +39 06 49255124

32 e-mail: francesca.dirosa@uniroma1.it

33

34

35 **Key words:** CD8 T cells, vaccination, antigen-specific response, clonal expansion,  
36 viral vectors, flow cytometry analysis, blood

37

38 **Abstract**

39

40 Although clonal expansion is a hallmark of adaptive immunity, the location(s) where  
41 antigen-responding T cells enter cell cycle and complete it have been poorly explored.  
42 This lack of knowledge stems partially from the limited experimental approaches  
43 available. By using Ki67 plus DNA staining and a novel data analysis technique, we  
44 distinguished antigen-specific CD8 T cells in G<sub>0</sub>, in G<sub>1</sub>, and in S-G<sub>2</sub>-M phases after  
45 intramuscular vaccination of BALB/c mice with antigen-expressing viral vectors. We  
46 discovered an entire population of cycling cells that are usually missed. This “extra”  
47 population was present early after vaccination in lymph nodes, spleen and,  
48 surprisingly, also in the blood, which is not expected to be a site for mitosis of normal  
49 non-leukemic cells. These results have implications for previous and future  
50 immunological studies in animal models, and potentially in humans. They might also  
51 inspire hematologists to seek for other missed populations of dividing cells in blood.

52

53

54 **Introduction**

55

56 Cell-to-cell interactions within tissue niches in solid organs and hematopoietic bone  
57 marrow (BM) regulate proliferation of stem cells and differentiated progenitors (1, 2),  
58 along with structural, physical, paracrine and neural cues provided by the  
59 microenvironment (3). Similarly, clonal expansion of T cells during adaptive immune  
60 responses is driven by antigen presenting cells within specialized niches in lymphoid  
61 organs, where local chemokines and cytokines guide T cell responses (4).

62

63 We nevertheless still lack essential spatial information on clonal expansion,  
64 particularly as to the location of T cells during each phase of the cell cycle. To date, T  
65 cell expansion in animal models has been mostly measured by dyes that label cells  
66 proliferating over time (e.g. CFSE; BrdU) (5, 6), without the ability to assess whether  
67 the labeled cells found in a particular location proliferated locally or rather migrated  
68 into that organ after dividing elsewhere. Another common method is staining for the  
69 intranuclear protein Ki67, after cell fixation and permeabilization (7–10). Though  
70 Ki67 is generally considered to label dividing cells, it actually labels all cells not in  
71  $G_0$ , not distinguishing actively cycling cells committed to mitosis (those in S- $G_2$ -M)  
72 from those in  $G_1$ , which may quickly proceed into S, or stay in a prolonged  $G_1$ , or  
73 even revert to  $G_0$  without dividing (11).

74

75 Here we used Ki67 plus DNA staining to track rare naïve antigen-specific CD8 T  
76 cells responding to vaccination in wild-type mice (12, 13). The naïve CD8 T cells  
77 clonally expanded, and we analyzed the resulting polyclonal population.

78

79 We found a significant number of antigen-responding CD8 T cells cycling in lymph  
80 nodes (LNs), spleen and (surprisingly) in the blood, a finding that opens new  
81 directions for the analysis of immune responses.

82

83

84 **Results**

85

86 BALB/c mice were vaccinated intramuscularly (i.m.) against the model antigen, HIV-  
87 1 gag, using a recombinant chimpanzee-derived adenoviral vector (ChAd3-gag) and a  
88 Modified Virus Ankara (MVA-gag) for priming and boosting, respectively (12). The  
89 cell cycle stages of gag-specific CD8 T cells were analyzed using Hoechst 33342, a  
90 DNA dye, and anti-Ki67 mAb (14, 15).

91

92 Fig 1A-B shows the steps for analysing gag-specific CD8 T cells by flow cytometry,  
93 fig. 1B an example of spleen and LN cell analysis at day (d) 3 post-boost. Steps 1-2  
94 identify single cells by DNA analysis, and live cells by dead cell marker exclusion.  
95 Step 3 uses Forward Scatter-A (FSC-A) and Side Scatter-A (SSC-A) profiles to  
96 identify certain leukocyte populations. Lymphocytes tend to have low SSC-A and  
97 medium-low FSC-A, whereas granulocytes have high SSC-A, and are normally  
98 excluded from the canonical ‘narrow’ gate used for lymphocyte studies (16–19) (Fig.  
99 1B, Step 3, ‘narrow’). However, we noticed an unusual population of cells with high  
100 SSC-A that appeared only in vaccinated spleens and contained a significant number  
101 of antigen-specific lymphocytes (Fig. 1B, Step 3, arrow). When we enlarged our  
102 FSC-A/ SSC-A gate (Step 3 ‘relaxed’), before labeling CD8 T cells (Step 4) and  
103 antigen-specific T cells (Step 5), we found a 2-6 fold greater proportion of gag-  
104 specific CD8 T cells in the ‘relaxed’ gate population than in the ‘narrow’ gate  
105 population: not only in the spleen but also in the LNs (Fig. 1B-D). Although this  
106 gating strategy is novel for standard ex vivo studies of lymphocytes (Fig. 1-S1), cells  
107 with high FSC-A and high SSC-A are often included when examining in vitro  
108 activated T cells (20).

109

110 In order to discriminate between gag-specific CD8 T cells in G<sub>0</sub>, G<sub>1</sub>, and S-G<sub>2</sub>-M, we  
111 examined Ki67 expression plus DNA content, using either the ‘narrow’ or the  
112 ‘relaxed’ gate (Fig. 2). We observed a striking difference in the percentages of  
113 proliferating cells between the two strategies. The ‘narrow’ gate missed most of the  
114 dividing cells in S-G<sub>2</sub>-M (<2%), whereas the ‘relaxed’ gate revealed that these cells  
115 made up to 42% of the gag-specific cells in LNs and 26% in spleen (Fig. 2A, C). Cell  
116 cycle entry and progression was accompanied by a graded increase of FSC-A, and  
117 more prominently of SSC-A (Fig. 2B-C). Proliferation was also seen after a single  
118 priming dose, though the kinetics were slower and there were fewer cells in S-G<sub>2</sub>-M  
119 (Fig. 2-S1).

120

121 The ‘narrow’ gate missed up to a third of gag-specific CD8 T cells in the blood (Fig.  
122 3A), which —with the ‘relaxed’ gate— averaged 2% at d3, 36% at d7, and 13% at  
123 d44 post-boost (Fig. 3B). As expected (12), gag-specific cells down-modulated  
124 CD62L (Fig 3-S1A-B). A well-defined population of mitotic gag-specific CD8 T  
125 cells was revealed uniquely using the ‘relaxed’ gate. Cells in S-G<sub>2</sub>-M were obvious at  
126 d3 (up to 13%) and less evident at d7 when Ki67<sup>+</sup> peaked (up to 94%), suggesting that  
127 Ki67<sup>+</sup> cells (non G<sub>0</sub>) persist in blood after mitotic cells disappear (Fig. 3C-D; 3-S1C-  
128 D). By day 44, almost all gag-specific cells were in G<sub>0</sub> (Fig. 3C), suggesting that they  
129 had mostly switched to a resting memory state. We also saw mitotic antigen-specific  
130 CD8 T cells in blood after a single priming shot of vaccine (Fig. 3-S2).

131

132 Hypothesizing that the increased DNA content of the expanding CD8 T cells could be  
133 exploited as a marker to identify antigen-responding cells in the blood, we focussed

134 on CD62L<sup>(-)</sup> cells, as CD62L is generally down-regulated upon activation (Fig. 3-  
135 S1A-B). We evaluated the frequency of gag-specific cells among the following 4  
136 populations of CD8 T cells (Fig. 4A): 1) total CD8 T (including naïve, memory and  
137 recently activated cells), 2) CD62L<sup>(-)</sup> (non-naïve cells), 3) CD62L<sup>(-)</sup> Ki67<sup>+</sup> (non-G<sub>0</sub>  
138 non-naïve cells), 4) CD62L<sup>(-)</sup> in S-G<sub>2</sub>-M (dividing non-naïve cells). At day 3, the  
139 average percentage of gag-specific cells among the dividing non-naïve cells was 15-  
140 fold higher than among total CD8 T cells (Fig. 4C), sometimes up to 70% (Fig 4B), a  
141 much higher proportion than observed among the other 3 populations (Fig 4B-C). By  
142 d7, the gag-specific cells comprised 40% of the dividing non-naïve and 84% of the  
143 non-G<sub>0</sub> non-naïve population. By d44 gag-specific cells were decreased in all the  
144 populations, though less evidently in the CD62L<sup>(-)</sup> population (Fig. 4C). Results were  
145 similar, though the kinetics slower, after a single priming dose (Fig 4-S1).

146

147 Since CD62L is a cell membrane molecule, and DNA can be visualized using vital  
148 dyes, our results suggest that the dividing CD62L<sup>(-)</sup> CD8 T cells in blood could  
149 potentially be a valuable source of live antigen-specific CD8 T cells at early times of  
150 response.

151

152

153 **Discussion**

154

155 Long ago, Sprent showed that, within days of an immunogenic stimulus, antigen-  
156 specific ‘blast’ T cells circulated in the thoracic duct lymph (21). There was no way  
157 of knowing at that time whether these were proliferating or simply activated cells.  
158 Here we show that mitotic antigen-specific T cells circulate in the blood stream,  
159 challenging the current view that the S-G<sub>2</sub>-M phases of clonal expansion occur only in  
160 lymphoid organs, or sometimes in BM, or in extra-lymphoid follicles in tissues (22,  
161 23). Thus proliferation is not always limited to supportive tissues sites, but cells that  
162 have been stimulated in one organ can expand while circulating to other sites.

163

164 Mitotic gag-specific CD8 T cells were found in the blood after a single dose of  
165 ChAd3-gag, although they were fewer than after a boost with MVA-gag, possibly due  
166 to slower kinetics, and/or differences in spatial distribution of antigen-responding  
167 CD8 T cells inside the LNs (24) that were reflected in the blood. Further studies will  
168 be necessary to elucidate whether naïve and memory cells behave differently upon  
169 stimulation in vivo, whether vaccination route matters, and whether the cycling CD8  
170 T cell clones in the blood comprise a special highly dividing subset and/or express  
171 high affinity TCRs.

172

173 The majority of dividing CD8 T cells in blood, spleen and LNs showed increased  
174 FSC-A and unusually high SSC-A, likely due to changes in mitochondria, chromatin  
175 condensation, etc. (25, 26). Cells with these characteristics are usually excluded from  
176 the analysis of normal lymphocytes ex vivo, for example human blood lymphocytes  
177 in conditions apart from cancer. Considering that nearly all immunological studies in



178 humans use blood samples, important informations are likely to be missed, perhaps  
179 leading to incorrect conclusions. For example, it was found that up to 70% of virus-  
180 specific CD8 T cells were Ki67<sup>+</sup> in the blood of patients at early phases of primary  
181 infections (8, 9), whereas memory-phenotype CD8 T cells from the blood of donors  
182 with no apparent infections comprised about 2-10% of Ki67<sup>+</sup> cells (27). Furthermore,  
183 an early increase of Ki67<sup>+</sup> PD-1<sup>+</sup> CD8 T cells was observed in the blood of a subset of  
184 lung cancer patients treated with checkpoint inhibitors, and it was proposed that this  
185 could be relevant for antitumor effects (28). In all these studies it was suggested that  
186 the Ki67<sup>+</sup> cells were proliferating in response to a recent immunogenic stimulus (8, 9,  
187 27, 28), however cells with high side scatter were discarded (9, 28), and DNA content  
188 was not evaluated (8, 9, 27, 28), thus it cannot be distinguished whether the Ki67<sup>+</sup>  
189 were actively cycling, or rather they were non-proliferating cells in G<sub>1</sub>, possibly on  
190 their way back to G<sub>0</sub>. Furthermore, the proliferation —when present— was likely  
191 greatly underestimated. A single study in humans did use DNA staining, and found  
192 that an average of <0.1% of memory-phenotype CD8 T cells were in S-G<sub>2</sub>-M in the  
193 blood of donors with no systemic diseases (27). The interpretation at that time was  
194 that blood-derived memory CD8 T cells are resting (27, 29, 30). We suggest instead  
195 that the cells in S-G<sub>2</sub>-M could have been newly activated cells responding to an  
196 environmental antigen.

197

198 Our results have several potential translational uses. For example, human blood  
199 might be the source of enriched populations of recently activated CD8 T cells,  
200 proliferating in response to vaccines, infections, transplantation and cancers, that  
201 could be studied, cloned and used therapeutically, even without knowing the antigen  
202 to which they are responding, or as a way of searching for that antigen. And, in cases

203 where a patient presents with symptoms of immune activation, but no obvious  
204 infection, an analysis of the mitotic cells in the blood could reveal clues as to the  
205 cause of the symptoms and/or the target of the response.

206

207 **Material and Methods**

208

209 Adenoviral and MVA vectors

210 Replication defective,  $\Delta E1 \Delta E2 \Delta E3$  ChAd3 vector encoding HIV-1 gag protein  
211 under HCMV promoter (ChAd3-gag, 21) (31) and Modified Vaccinia Ankara  
212 encoding the HIV-1 gag protein under the control of vaccinia p7.5 promoter (MVA-  
213 gag) were used in all experiments.

214

215 Vaccination

216 Six-week-old female BALB/c mice from Envigo (S. Pietro al Natisone, Udine, Italy)  
217 were housed at Plaisant animal facility (Castel Romano, Rome, Italy), and divided  
218 into experimental groups of at least 40 mice each (untreated and vaccinated). All mice  
219 of the vaccinated group were primed with ChAd3-gag, and a subset was analyzed  
220 after priming only. The remaining primed mice were boosted once with MVA-gag, at  
221 either d60 (range 60-67) or d100 (range 95-109) post-prime. Results of d60 and d100  
222 boosts were similar, thus we combined them. Viral vectors were administered i.m. in  
223 the quadriceps at a dose of  $10^7$  viral particles (vp) for ChAd3-gag and  $10^6$  plaque-  
224 forming units (pfu) for MVA-gag, in a volume of 50  $\mu$ l per side (100  $\mu$ l total). All  
225 experimental procedures were approved by the local animal ethics council and  
226 performed in accordance with national and international laws and policies (UE  
227 Directive 2010/63/UE; Italian Legislative Decree 26/2014). Vaccination procedures  
228 were performed under anesthesia, and all efforts were made to reduce animal numbers  
229 and minimize suffering.

230

231 Organs

232 Spleen, LNs and blood were obtained at different times after either prime or boost, i.e.  
233 d7, d10 and d14 post-prime; d3, d7 and d44 post-boost. At each time, the organs were  
234 collected from 3 vaccinated and 3 untreated mice, and cells from the 3 mice of each  
235 group were pooled. At d7 (and in one experiment at d3) blood was obtained by  
236 submandibular vein puncture in conscious mice. At all the other time points organ  
237 harvesting was scheduled, thus blood was obtained by cardiac puncture upon carbon  
238 dioxide euthanasia. Blood was immediately put into Heparin or EDTA blood  
239 collection tubes and further processed for analysis. Single-cell suspensions were  
240 prepared from spleen and LNs (iliac and inguinal) by mechanical disruption and  
241 passage through cell strainers (32).

242

#### 243 Membrane Staining

244 Spleen and LN cells were incubated with Fixable Viability Dye conjugated with  
245 eFluor780 fluorochrome (Affimetrix, eBioscience, Santa Clara, CA) and background  
246 staining was blocked with anti-Fc $\gamma$ R mAb (clone 2.4G2). Cells were then incubated  
247 for 15 minutes at 4°C with H-2k(d) AMQMLKETI APC-labeled Tetramer (Tetr-gag,  
248 NIH Tetramer Core Facility, Atlanta, GA) and PE-labeled Pentamer (Pent-gag,  
249 Proimmune, Oxford, UK) to stain for gag<sub>197-205</sub>(gag)-specific CD8 T cells. Cells were  
250 incubated for further 15 minutes at 4°C after addition of the following mAbs: anti-  
251 CD3 peridinin chlorophyll protein (PerCP)-Cy5.5 (clone 145-2C11, BD Biosciences),  
252 anti-CD8 $\alpha$  BUV805 (clone 53-6.7, BD Biosciences), anti-CD62L phycoerythrin (PE)-  
253 Cy7 (clone MEL-14, Biolegend, San Diego, CA, USA). Blood samples were  
254 incubated for 30 minutes at RT with the above antibodies/reagents that were placed  
255 all together. After washing, blood cells were fixed with Cell Fix solution (BD  
256 Biosciences). Red cells were lysed with Pharm Lyse solution (BD Biosciences).

257

## 258 Intracellular Staining

259 Intracellular staining for Ki67 and DNA was performed as previously described, with  
260 some modifications (14, 15). Cells were fixed and permeabilized with  
261 Foxp3/Transcription Factor Staining Buffer (Affimetrix, eBioscience). Intracellular  
262 staining was performed with anti-Ki67 mAb conjugated with Fluorescein  
263 isothiocyanate (FITC) or Alexafluor 700 (clone SolA-15; eBioscience). DNA was  
264 stained by incubation with Hoechst 33342 (Thermo Fisher Scientific, Waltham, MA).

265

## 266 Flow cytometry analysis

267 Samples were analyzed by LSRFortessa flow cytometer (BD Biosciences), gating out  
268 CD3<sup>(-)</sup> cells when acquiring spleen samples. Data were analysed using FlowJo  
269 software, v.10 (FlowJo, Ashland, OR, USA).

270

## 271 Statistical analysis

272 At each time point, the vaccinated group was compared with its corresponding  
273 untreated group by performing a two-tailed unpaired Student t test with Welch's  
274 correction. A two-tailed paired Student t test was used for comparison of N and R  
275 gates. Friedman test with Dunn's multiple comparison was used for comparison of  
276 multiple cell subsets within vaccinated mice samples. Differences were considered  
277 significant when \* $p \leq 0.05$ ; \*\*  $p \leq 0.01$ ; \*\*\*  $p \leq 0.001$ . Statistical analysis was  
278 performed using Prism v.6.0f, GraphPad Software (La Jolla, CA, USA).

279

280 **Author contributions**

281 F.D. designed experiments, interpreted the results and wrote the paper with help by  
282 S.S., A. Natalini and A.S.; A.F., S. C. and A. Nicosia prepared the viral vectors and  
283 performed mouse treatments, S.S. and A.N. performed/analyzed flow cytometry  
284 experiments.

285

286 **Acknowledgements**

287 We thank A. Hayday, M. Munoz-Ruiz and F. Granucci for discussion. A special  
288 thank to P. Matzinger for providing precious advices and for reading the manuscript.

289 The following tetramer was obtained through the NIH Tetramer Facility: APC-  
290 conjugated H-2K(d) HIV gag 197–205 AMQMLKETI

291

292 **Funding**

293 Work supported by Reithera, by CTN01\_00177\_962865 (Medintech) grant from  
294 Ministero dell'Università e delle Ricerca (MIUR) and by 5 x 1000 grant from  
295 Associazione Italiana Ricerca sul Cancro (AIRC).

296

297 **Conflict of interest disclosure**

298 A.F., S. C. and A. Nicosia are employees of Reithera. Alfredo Nicosia is named  
299 inventor on patent application WO 2005071093 (A3) “Chimpanzee adenovirus  
300 vaccine carriers”. Authors do not disclose any other conflict of interest.

301

302

303



305 **References**

306

- 307 1. Yamashita, Y. M. 2010. Cell adhesion in regulation of asymmetric stem cell  
308 division. *Curr Opin Cell Biol* 22: 605-610.doi: 10.1016/j.ceb.2010.07.009
- 309 2. Bianco, P. 2011. Bone and the hematopoietic niche: a tale of two stem cells.  
310 *Blood* 117: 5281-5288.doi: 10.1182/blood-2011-01-315069
- 311 3. Scadden, D. T. 2006. The stem-cell niche as an entity of action. *Nature* 441:  
312 1075-1079.doi: 10.1038/nature04957
- 313 4. Castellino, F., A. Y. Huang, G. Altan-Bonnet, S. Stoll, C. Scheinecker, and R.  
314 N. Germain. 2006. Chemokines enhance immunity by guiding naive CD8+ T  
315 cells to sites of CD4+ T cell-dendritic cell interaction. *Nature* 440: 890-895.doi:  
316 10.1038/nature04651
- 317 5. Murali-Krishna, K., J. D. Altman, M. Suresh, D. J. Sourdive, A. J. Zajac, J. D.  
318 Miller, J. Slansky, and R. Ahmed. 1998. Counting antigen-specific CD8 T cells:  
319 a reevaluation of bystander activation during viral infection. *Immunity* 8: 177-  
320 187.doi:
- 321 6. van Stipdonk, M. J., E. E. Lemmens, and S. P. Schoenberger. 2001. Naive CTLs  
322 require a single brief period of antigenic stimulation for clonal expansion and  
323 differentiation. *Nat Immunol* 2: 423-429.doi: 10.1038/87730
- 324 7. Pandrea, I., T. Gaufin, R. Gautam, J. Kristoff, D. Mandell, D. Montefiori, B. F.  
325 Keele, R. M. Ribeiro, R. S. Veazey, and C. Apetrei. 2011. Functional Cure of  
326 SIVagm Infection in Rhesus Macaques Results in Complete Recovery of CD4+  
327 T Cells and Is Reverted by CD8+ Cell Depletion. *PLoS Pathogens* 7:  
328 e1002170.doi: 10.1371/journal.ppat.1002170
- 329 8. Zaunders, J. J. 2005. Early proliferation of CCR5+ CD38+++ antigen-specific  
330 CD4+ Th1 effector cells during primary HIV-1 infection. *Blood* 106: 1660-  
331 1667.doi: 10.1182/blood-2005-01-0206
- 332 9. van Aalderen, M. C., E. B. Remmerswaal, N. J. Verstegen, P. Hombrink, A. ten  
333 Brinke, H. Pircher, N. A. Kootstra, I. J. ten Berge, and R. A. van Lier. 2015.  
334 Infection history determines the differentiation state of human CD8+ T cells. *J*  
335 *Virol* 89: 5110-5123.doi: 10.1128/JVI.03478-14
- 336 10. Bolinger, B., S. Sims, L. Swadling, G. O'Hara, C. de Lara, D. Baban, N. Saghal,  
337 L. N. Lee, E. Marchi, M. Davis, E. Newell, S. Capone, A. Folgori, E. Barnes,  
338 and P. Klenerman. 2015. Adenoviral Vector Vaccination Induces a Conserved  
339 Program of CD8(+) T Cell Memory Differentiation in Mouse and Man. *Cell Rep*  
340 13: 1578-1588.doi: 10.1016/j.celrep.2015.10.034
- 341 11. Di Rosa, F. 2016. Two Niches in the Bone Marrow: A Hypothesis on Life-long  
342 T Cell Memory. *Trends Immunol* 37: 503-512.doi: 10.1016/j.it.2016.05.004
- 343 12. Quinn, K. M., A. Da Costa, A. Yamamoto, D. Berry, R. W. Lindsay, P. A.  
344 Darrah, L. Wang, C. Cheng, W. P. Kong, J. G. Gall, A. Nicosia, A. Folgori, S.  
345 Colloca, R. Cortese, E. Gostick, D. A. Price, C. E. Gomez, M. Esteban, L. S.  
346 Wyatt, B. Moss, C. Morgan, M. Roederer, R. T. Bailer, G. J. Nabel, R. A. Koup,  
347 and R. A. Seder. 2013. Comparative analysis of the magnitude, quality,  
348 phenotype, and protective capacity of simian immunodeficiency virus gag-  
349 specific CD8+ T cells following human-, simian-, and chimpanzee-derived  
350 recombinant adenoviral vector immunization. *J Immunol* 190: 2720-2735.doi:  
351 10.4049/jimmunol.1202861
- 352 13. Stanley, D. A., A. N. Honko, C. Asiedu, J. C. Trefry, A. W. Lau-Kilby, J. C.



- 353 Johnson, L. Hensley, V. Ammendola, A. Abbate, F. Grazioli, K. E. Foulds, C.  
354 Cheng, L. Wang, M. M. Donaldson, S. Colloca, A. Folgori, M. Roederer, G. J.  
355 Nabel, J. Mascola, A. Nicosia, R. Cortese, R. A. Koup, and N. J. Sullivan. 2014.  
356 Chimpanzee adenovirus vaccine generates acute and durable protective  
357 immunity against ebolavirus challenge. *Nat Med* 20: 1126-1129.doi:  
358 10.1038/nm.3702
- 359 14. Wilson, A., M. J. Murphy, T. Oskarsson, K. Kaloulis, M. D. Bettess, G. M.  
360 Oser, A. C. Pasche, C. Knabenhans, H. R. Macdonald, and A. Trumpp. 2004. c-  
361 Myc controls the balance between hematopoietic stem cell self-renewal and  
362 differentiation. *Genes Dev* 18: 2747-2763.doi: 10.1101/gad.313104
- 363 15. Hirche, C., T. Frenz, S. F. Haas, M. Döring, K. Borst, P. K. Tegtmeyer, I.  
364 Brizic, S. Jordan, K. Keyser, C. Chhatbar, E. Pronk, S. Lin, M. Messerle, S.  
365 Jonjic, C. S. Falk, A. Trumpp, M. A. G. Essers, and U. Kalinke. 2017. Systemic  
366 Virus Infections Differentially Modulate Cell Cycle State and Functionality of  
367 Long-Term Hematopoietic Stem Cells In Vivo. *Cell Rep* 19: 2345-2356.doi:  
368 10.1016/j.celrep.2017.05.063
- 369 16. Cossarizza, A., H. D. Chang, A. Radbruch, M. Akdis, I. Andrä, F. Annunziato,  
370 P. Bacher, V. Barnaba, L. Battistini, W. M. Bauer, S. Baumgart, B. Becher, W.  
371 Beisker, C. Berek, A. Blanco, G. Borsellino, P. E. Boulais, R. R. Brinkman, M.  
372 Büscher, D. H. Busch, T. P. Bushnell, X. Cao, A. Cavani, P. K. Chattopadhyay,  
373 Q. Cheng, S. Chow, M. Clerici, A. Cooke, A. Cosma, L. Cosmi, A. Cumano, V.  
374 D. Dang, D. Davies, S. De Biasi, G. Del Zotto, S. Della Bella, P. Dellabona, G.  
375 Deniz, M. Dessing, A. Diefenbach, J. Di Santo, F. Dieli, A. Dolf, V. S.  
376 Donnenberg, T. Dörner, G. R. A. Ehrhardt, E. Endl, P. Engel, B. Engelhardt, C.  
377 Esser, B. Everts, A. Dreher, C. S. Falk, T. A. Fehniger, A. Filby, S. Fillatreau,  
378 M. Follo, I. Förster, J. Foster, G. A. Foulds, P. S. Frenette, D. Galbraith, N.  
379 Garbi, M. D. García-Godoy, J. Geginat, K. Ghoreschi, L. Gibellini, C.  
380 Goettlinger, C. S. Goodyear, A. Gori, J. Grogan, M. Gross, A. Grützkau, D.  
381 Grummitt, J. Hahn, Q. Hammer, A. E. Hauser, D. L. Haviland, D. Hedley, G.  
382 Herrera, M. Herrmann, F. Hiepe, T. Holland, P. Hombrink, J. P. Houston, B. F.  
383 Hoyer, B. Huang, C. A. Hunter, A. Iannone, H. M. Jäck, B. Jávega, S. Jonjic, K.  
384 Juelke, S. Jung, T. Kaiser, T. Kalina, B. Keller, S. Khan, D. Kienhöfer, T.  
385 Kroneis, D. Kunkel, C. Kurts, P. Kvistborg, J. Lannigan, O. Lantz, A. Larbi, S.  
386 LeibundGut-Landmann, M. D. Leipold, M. K. Levings, V. Litwin, Y. Liu, M.  
387 Lohoff, G. Lombardi, L. Lopez, A. Lovett-Racke, E. Lubberts, B. Ludewig, E.  
388 Lugli, H. T. Maecker, G. Martus, G. Matarese, C. Maueröder, M. McGrath, I.  
389 McInnes, H. E. Mei, F. Melchers, S. Melzer, D. Mielenz, K. Mills, D. Mirrer, J.  
390 Mjösberg, J. Moore, B. Moran, A. Moretta, L. Moretta, T. R. Mosmann, S.  
391 Müller, W. Müller, C. Münz, G. Multhoff, L. E. Munoz, K. M. Murphy, T.  
392 Nakayama, M. Nasi, C. Neudörfl, J. Nolan, S. Nourshargh, J. E. O'Connor, W.  
393 Ouyang, A. Oxenius, R. Palankar, I. Panse, P. Peterson, C. Peth, J. Petriz, D.  
394 Philips, W. Pickl, S. Piconese, M. Pinti, A. G. Pockley, M. J. Podolska, C.  
395 Pucillo, S. A. Quataert, T. R. D. J. Radstake, B. Rajwa, J. A. Rebhahn, D.  
396 Recktenwald, E. B. M. Remmerswaal, K. Rezvani, L. G. Rico, J. P. Robinson,  
397 C. Romagnani, A. Rubartelli, B. Ruckert, J. Ruland, S. Sakaguchi, F. Sala-de-  
398 Oyanguren, Y. Samstag, S. Sanderson, B. Sawitzki, A. Scheffold, M.  
399 Schiemann, F. Schildberg, E. Schimisky, S. A. Schmid, S. Schmitt, K. Schober,  
400 T. Schüler, A. R. Schulz, T. Schumacher, C. Scotta, T. V. Shankey, A. Shemer,  
401 A. K. Simon, J. Spidlen, A. M. Stall, R. Stark, C. Stehle, M. Stein, T. Steinmetz,  
402 H. Stockinger, Y. Takahama, A. Tarnok, Z. Tian, G. Toldi, J. Tornack, E.

- 403 Traggiai, J. Trotter, H. Ulrich, M. van der Braber, R. A. W. van Lier, M.  
404 Veldhoen, S. Vento-Asturias, P. Vieira, D. Voehringer, H. D. Volk, K. von  
405 Volkmann, A. Waisman, R. Walker, M. D. Ward, K. Warnatz, S. Warth, J. V.  
406 Watson, C. Watzl, L. Wegener, A. Wiedemann, J. Wienands, G. Willimsky, J.  
407 Wing, P. Wurst, L. Yu, A. Yue, Q. Zhang, Y. Zhao, S. Ziegler, and J.  
408 Zimmermann. 2017. Guidelines for the use of flow cytometry and cell sorting in  
409 immunological studies. *Eur J Immunol* 47: 1584-1797.doi:  
410 10.1002/eji.201646632
- 411 17. Ahmed, R., L. Roger, P. Costa Del Amo, K. L. Miners, R. E. Jones, L. Boelen,  
412 T. Fali, M. Elemans, Y. Zhang, V. Appay, D. M. Baird, B. Asquith, D. A. Price,  
413 D. C. Macallan, and K. Ladell. 2016. Human Stem Cell-like Memory T Cells  
414 Are Maintained in a State of Dynamic Flux. *Cell Rep* 17: 2811-2818.doi:  
415 10.1016/j.celrep.2016.11.037
- 416 18. Yu, W., N. Jiang, P. J. Ebert, B. A. Kidd, S. Müller, P. J. Lund, J. Juang, K.  
417 Adachi, T. Tse, M. E. Birnbaum, E. W. Newell, D. M. Wilson, G. M.  
418 Grotenbreg, S. Valitutti, S. R. Quake, and M. M. Davis. 2015. Clonal Deletion  
419 Prunes but Does Not Eliminate Self-Specific  $\alpha\beta$  CD8(+) T Lymphocytes.  
420 *Immunity* 42: 929-941.doi: 10.1016/j.immuni.2015.05.001
- 421 19. Gordon, C. L., M. Miron, J. J. Thome, N. Matsuoka, J. Weiner, M. A. Rak, S.  
422 Igarashi, T. Granot, H. Lerner, F. Goodrum, and D. L. Farber. 2017. Tissue  
423 reservoirs of antiviral T cell immunity in persistent human CMV infection. *J*  
424 *Exp Med* 214: 651-667.doi: 10.1084/jem.20160758
- 425 20. Aslan, N., L. B. Watkin, A. Gil, R. Mishra, F. G. Clark, R. M. Welsh, D. Ghersi,  
426 K. Luzuriaga, and L. K. Selin. 2017. Severity of Acute Infectious  
427 Mononucleosis Correlates with Cross-Reactive Influenza CD8 T-Cell Receptor  
428 Repertoires. *MBio* 8: 10.1128/mBio.01841-17
- 429 21. Sprent, J., and J. F. Miller. 1972. Interaction of thymus lymphocytes with  
430 histoincompatible cells. II. Recirculating lymphocytes derived from antigen-  
431 activated thymus cells. *Cell Immunol* 3: 385-404.doi:
- 432 22. Siracusa, F., M. A. McGrath, P. Maschmeyer, M. Bardua, K. Lehmann, G.  
433 Heinz, P. Durek, F. F. Heinrich, M. F. Mashreghi, H. D. Chang, K. Tokoyoda,  
434 and A. Radbruch. 2018. Nonfollicular reactivation of bone marrow resident  
435 memory CD4 T cells in immune clusters of the bone marrow. *Proc Natl Acad*  
436 *Sci U S A* 10.1073/pnas.1715618115
- 437 23. Jones, G. W., and S. A. Jones. 2016. Ectopic lymphoid follicles: inducible  
438 centres for generating antigen-specific immune responses within tissues.  
439 *Immunology* 147: 141-151.doi: 10.1111/imm.12554
- 440 24. Kastenmüller, W., M. Brandes, Z. Wang, J. Herz, J. G. Egen, and R. N.  
441 Germain. 2013. Peripheral prepositioning and local CXCL9 chemokine-  
442 mediated guidance orchestrate rapid memory CD8+ T cell responses in the  
443 lymph node. *Immunity* 38: 502-513.doi: 10.1016/j.immuni.2012.11.012
- 444 25. Darzynkiewicz, Z., L. Staiano-Coico, and M. R. Melamed. 1981. Increased  
445 mitochondrial uptake of rhodamine 123 during lymphocyte stimulation. *Proc*  
446 *Natl Acad Sci U S A* 78: 2383-2387.doi:
- 447 26. Nusse, M., W. Beisker, C. Hoffmann, and A. Tarnok. 1990. Flow cytometric  
448 analysis of G1- and G2/M-phase subpopulations in mammalian cell nuclei using  
449 side scatter and DNA content measurements. *Cytometry* 11: 813-821.doi:  
450 10.1002/cyto.990110707
- 451 27. Okhrimenko, A., J. R. Grun, K. Westendorf, Z. Fang, S. Reinke, P. von Roth, G.  
452 Wassilew, A. A. Kuhl, R. Kudernatsch, S. Demski, C. Scheibenbogen, K.

- 453 Tokoyoda, M. A. McGrath, M. J. Raftery, G. Schonrich, A. Serra, H. D. Chang,  
454 A. Radbruch, and J. Dong. 2014. Human memory T cells from the bone marrow  
455 are resting and maintain long-lasting systemic memory. *Proc Natl Acad Sci U S*  
456 *A* 111: 9229-9234.doi: 10.1073/pnas.1318731111
- 457 28. Kamphorst, A. O., R. N. Pillai, S. Yang, T. H. Nasti, R. S. Akondy, A. Wieland,  
458 G. L. Sica, K. Yu, L. Koenig, N. T. Patel, M. Behera, H. Wu, M. McCausland,  
459 Z. Chen, C. Zhang, F. R. Khuri, T. K. Owonikoko, R. Ahmed, and S. S.  
460 Ramalingam. 2017. Proliferation of PD-1+ CD8 T cells in peripheral blood after  
461 PD-1-targeted therapy in lung cancer patients. *Proc Natl Acad Sci U S A* 114:  
462 4993-4998.doi: 10.1073/pnas.1705327114
- 463 29. Di Rosa, F. 2016. Maintenance of memory T cells in the bone marrow: survival  
464 or homeostatic proliferation? *Nat Rev Immunol* 16: 271.doi: 10.1038/nri.2016.31
- 465 30. Sercan Alp, O., and A. Radbruch. 2016. The lifestyle of memory CD8(+) T  
466 cells. *Nat Rev Immunol* 16: 271.doi: 10.1038/nri.2016.32
- 467 31. Colloca, S., E. Barnes, A. Folgari, V. Ammendola, S. Capone, A. Cirillo, L.  
468 Siani, M. Naddeo, F. Grazioli, M. L. Esposito, M. Ambrosio, A. Sparacino, M.  
469 Bartiromo, A. Meola, K. Smith, A. Kurioka, G. A. O'Hara, K. J. Ewer, N.  
470 Anagnostou, C. Bliss, A. V. Hill, C. Traboni, P. Klenerman, R. Cortese, and A.  
471 Nicosia. 2012. Vaccine vectors derived from a large collection of simian  
472 adenoviruses induce potent cellular immunity across multiple species. *Sci Transl*  
473 *Med* 4: 115ra2.doi: 10.1126/scitranslmed.3002925
- 474 32. Quinci, A. C., S. Vitale, E. Parretta, A. Soriani, M. L. Iannitto, M. Cippitelli, C.  
475 Fionda, S. Bulfone-Paus, A. Santoni, and F. Di Rosa. 2012. IL-15 inhibits IL-  
476 7Ralpha expression by memory-phenotype CD8(+) T cells in the bone marrow.  
477 *Eur J Immunol* 42: 1129-1139.doi: 10.1002/eji.201142019
- 478 33. Villarroya-Beltri, C., C. Gutiérrez-Vázquez, F. Sánchez-Madrid, and M.  
479 Mittelbrunn. 2013. Analysis of microRNA and protein transfer by exosomes  
480 during an immune synapse. *Methods Mol Biol* 1024: 41-51.doi: 10.1007/978-1-  
481 62703-453-1\_4
- 482 34. Deng, N., J. M. Weaver, and T. R. Mosmann. 2014. Cytokine diversity in the  
483 Th1-dominated human anti-influenza response caused by variable cytokine  
484 expression by Th1 cells, and a minor population of uncommitted IL-2+IFNγ-  
485 Thpp cells. *PLoS One* 9: e95986.doi: 10.1371/journal.pone.0095986
- 486  
487

488

489

490 **List of Figures (4) and Supplementary Figures (5)**

491

492 FIGURE 1. Comparison between the narrow (N) and the relaxed (R) gating strategy  
493 to evaluate frequency of gag-specific CD8 T cells from spleen and LNs of vaccinated  
494 mice at day (d) 3 post-boost.

495 [Figure 1-Figure Supplement 1: Comparison between the N and the R gating strategy  
496 to evaluate frequency of gag-specific CD8 T cells in spleen and LNs after single cell  
497 discrimination by FSC-A/ FSC-H].

498

499 FIGURE 2. Comparison between the narrow (N) and the relaxed (R) gating strategy  
500 to evaluate cell cycle of gag-specific CD8 T cell from spleen and LNs of vaccinated  
501 mice at d3 post-boost.

502 [Figure 2- Figure Supplement 1. Analysis of frequency and cell cycle of gag-specific  
503 CD8 T cells in spleen and LNs after prime only].

504

505 FIGURE 3. Analysis of the frequency and cell cycle of gag-specific CD8 T cells in  
506 the blood of vaccinated mice at d3, d7 and d44 post-boost.

507 [Figure 3- Figure Supplement 1. Examples of flow cytometry analysis of gag-specific  
508 CD8 T cells in the blood of vaccinated mice at d3, d7 and d44 post-boost.]

509 [Figure 3- Figure Supplement 2. Analysis of frequency and cell cycle of gag-specific  
510 CD8 T cells in the blood after prime only].

511

512 FIGURE 4. Specific enrichment of gag-specific CD8 T cells within a population of  
513 CD62L<sup>(-)</sup> CD8 T cells in S-G<sub>2</sub>-M in the blood of vaccinated mice at d3 post-boost.

514 [Figure 4- Figure Supplement 1: Specific enrichment of gag-specific CD8 T cells  
515 within a population of CD62L<sup>(+)</sup> CD8 T cells in S-G<sub>2</sub>-M in the blood of primed mice].  
516

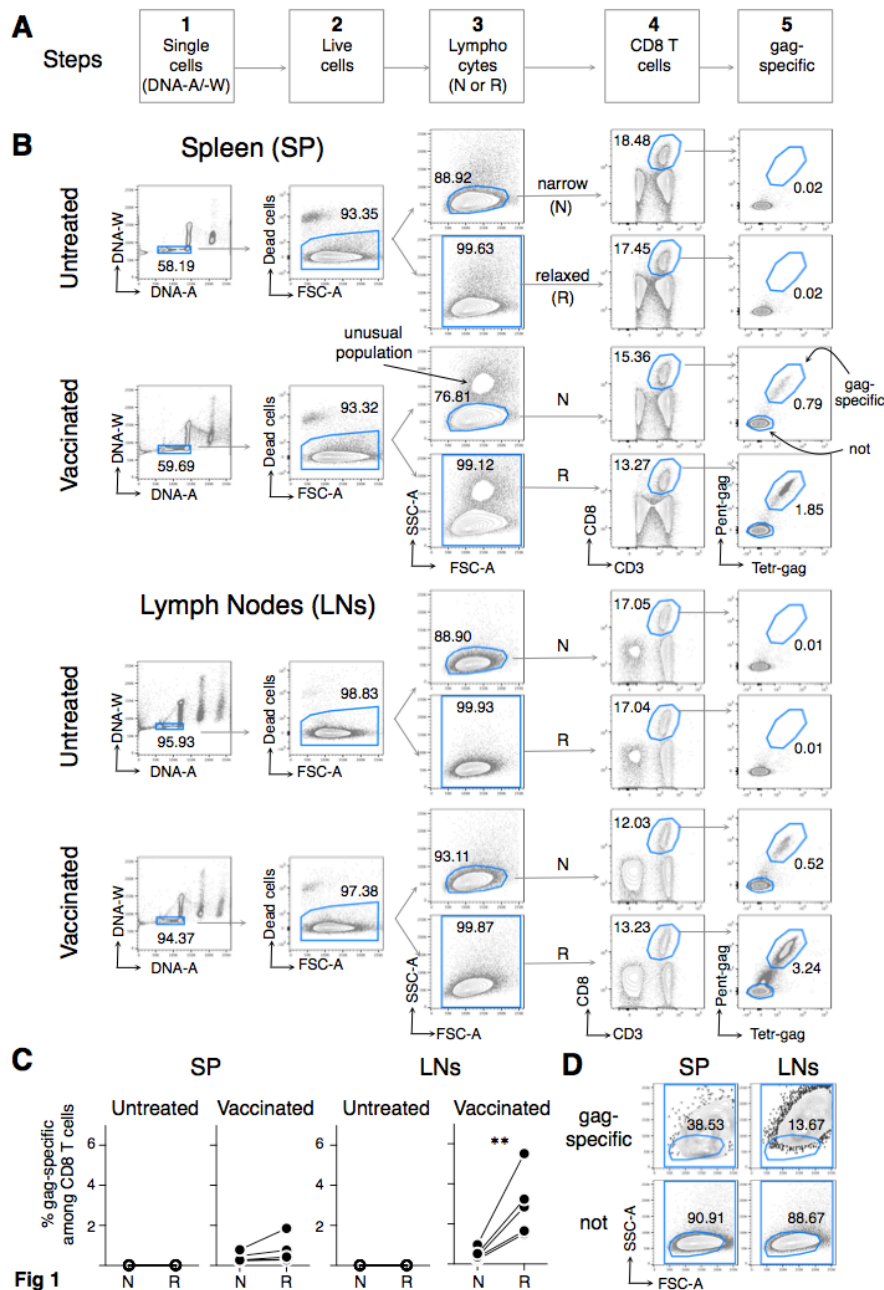

**FIGURE 1. Comparison between the narrow (N) and the relaxed (R) gating strategy to evaluate frequency of gag-specific CD8 T cells from spleen and LNs of vaccinated mice at day (d) 3 post-boost.**

Female BALB/c mice were vaccinated by prime i.m. with ChAd3-gag ( $10^7$  vp) and boost i.m. with MVA-gag ( $10^6$  pfu). Cells from Spleen (SP) and LN (LNs) of vaccinated and untreated mice were analyzed by flow cytometry at d3 post-boost.  $CD3^{(-)}$  cells were gated out when acquiring spleen samples. (A) Scheme of the gating strategy for analysis of flow cytometry data in 5 steps, to identify the following cells: single cells (Step 1); live cells (Step 2); lymphocytes (Step 3); CD8 T cells (Step 4); gag-specific cells (Step 5). (B) Examples of flow cytometry analysis of cells from spleen (top) and LNs (bottom). At step 1, we discriminated single cells from doublets and aggregates by DNA content (DNA-A versus DNA-W). At Step 2 we excluded dead cells using the eFluor780 Fixable Viability Dye. At Step 3, we used either the canonical gate for lymphocyte analysis ('narrow', N) or our proposed gate ('relaxed', R) in the FSC-A/ SSC-A plot, as indicated. At Step 4 we gated on  $CD3^{+} CD8^{+}$  cells, and at Step 5 we evaluated the percentages of gag<sub>197-205</sub> (gag)-specific cells among them, by combined staining with Pent-gag and Tetr-gag. The numbers represent the percentages of cells in the indicated regions. The arrow in the vaccinated spleen FSC-A/ SSC-A plot indicates an unusual population of cells that was excluded by the N gate (see main text). (C) Summary of gag-specific CD8 T cell frequencies in spleen and LNs. The figure summarizes results obtained in 5 prime/boost experiments with a total of 30 mice. Statistically significant differences between N and R are indicated (\*\*  $p < 0.01$ ). Differences in the frequency of gag-specific CD8 T cells between untreated and vaccinated mice were statistically significant both in spleen and LNs, using either R or N gating strategy ( $p \leq 0.05$ , not shown). (D) Typical FSC-A/ SSC-A plots of gag-specific and not-specific CD8 T cells from spleen and LNs of vaccinated mice at d3 post-boost, gated using the R gate as in B.

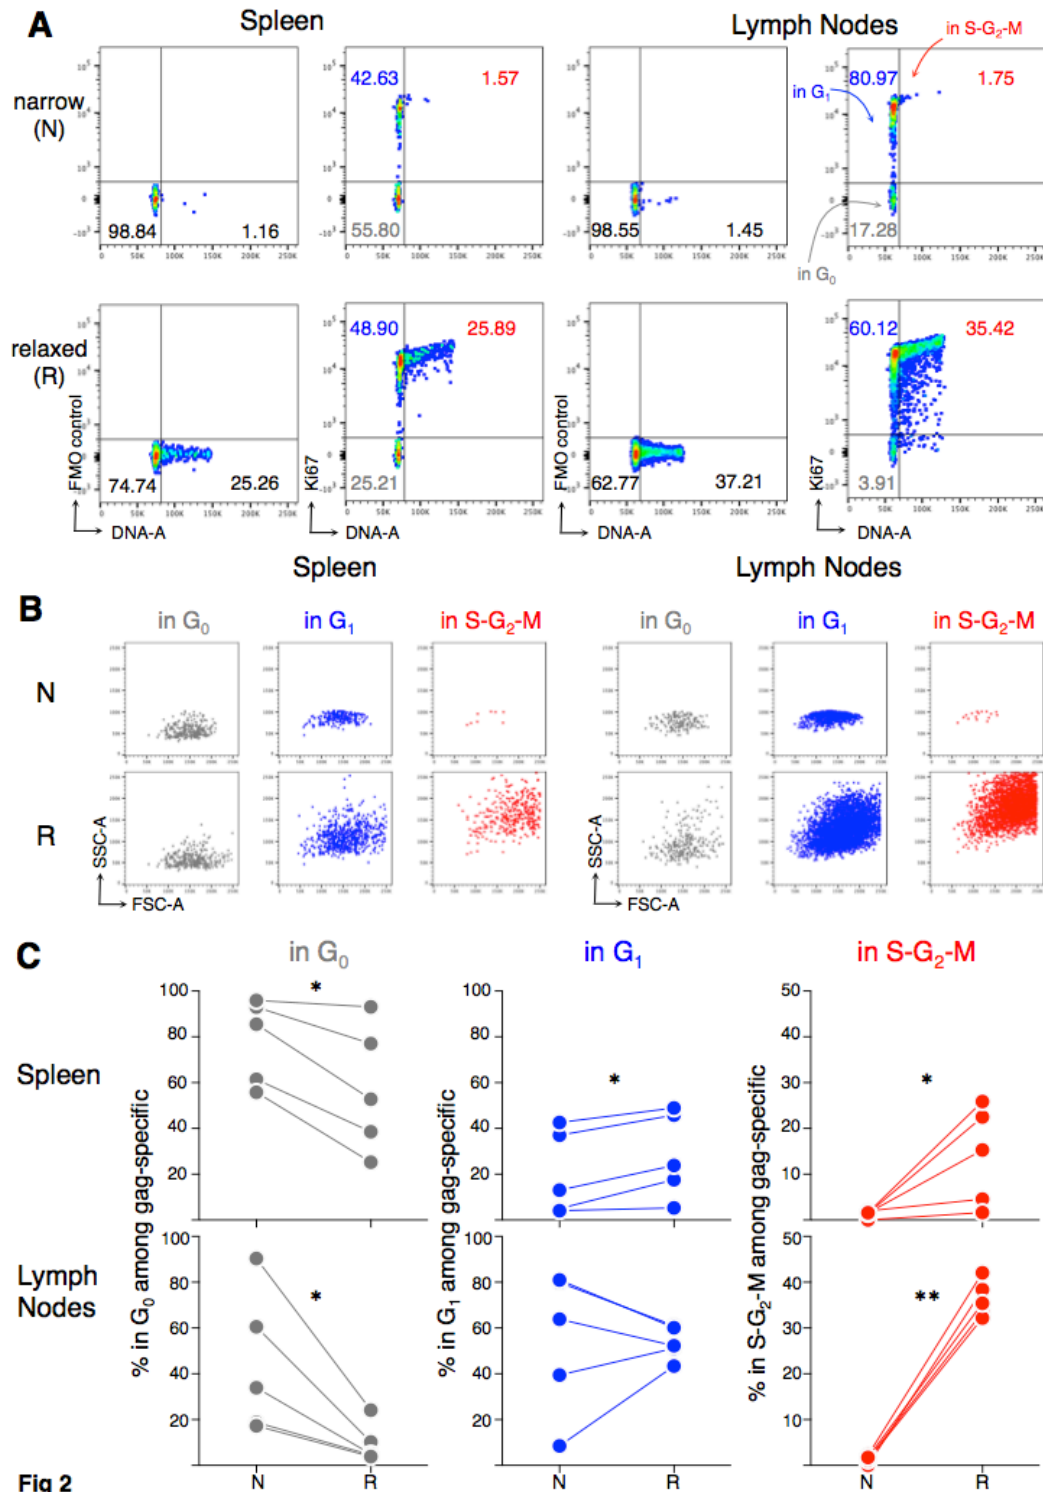

**Fig 2**

**FIGURE 2. Comparison between the narrow (N) and the relaxed (R) gating strategy to evaluate cell cycle of gag-specific CD8 T cell from spleen and LNs of vaccinated mice at d3 post-boost.**

Cell cycle of gag-specific CD8 T cells at d3 post-boost was analyzed by Ki67 plus DNA staining, using either the N or the R gating strategy as in Fig. 1B. (A) Typical DNA/ Ki67 staining profiles of spleen (left) and LNs (right), after gating on gag-specific CD8 T cells. Fluorescence Minus One (FMO) controls and Ki67 staining are shown, as indicated. Based on DNA and Ki67 staining, cells in the following phases of cell cycle were identified in the corresponding quadrant: cells in G<sub>0</sub> (Ki67<sup>-</sup>, 2n DNA), cells in G<sub>1</sub> (Ki67<sup>+</sup>, 2n DNA) and cells in S-G<sub>2</sub>-M (Ki67<sup>+</sup>, 2n<DNA<4n), as indicated. The numbers represent the percentages of cells in the corresponding quadrant. (B) Typical FSC-A/ SSC-A plots of gag-specific CD8 T cells in G<sub>0</sub>, G<sub>1</sub> and S-G<sub>2</sub>-M, gated as in A. (C) Summary of the percentages of gag-specific CD8 T cells in G<sub>0</sub>, in G<sub>1</sub> and in S-G<sub>2</sub>-M in spleen (top) and LNs (bottom), gated as in A. The figure summarizes results obtained in 5 boost experiments with a total of 30 mice. Statistically significant differences between N and R are indicated (\*  $p \leq 0.05$ ; \*\*  $p \leq 0.01$ ).

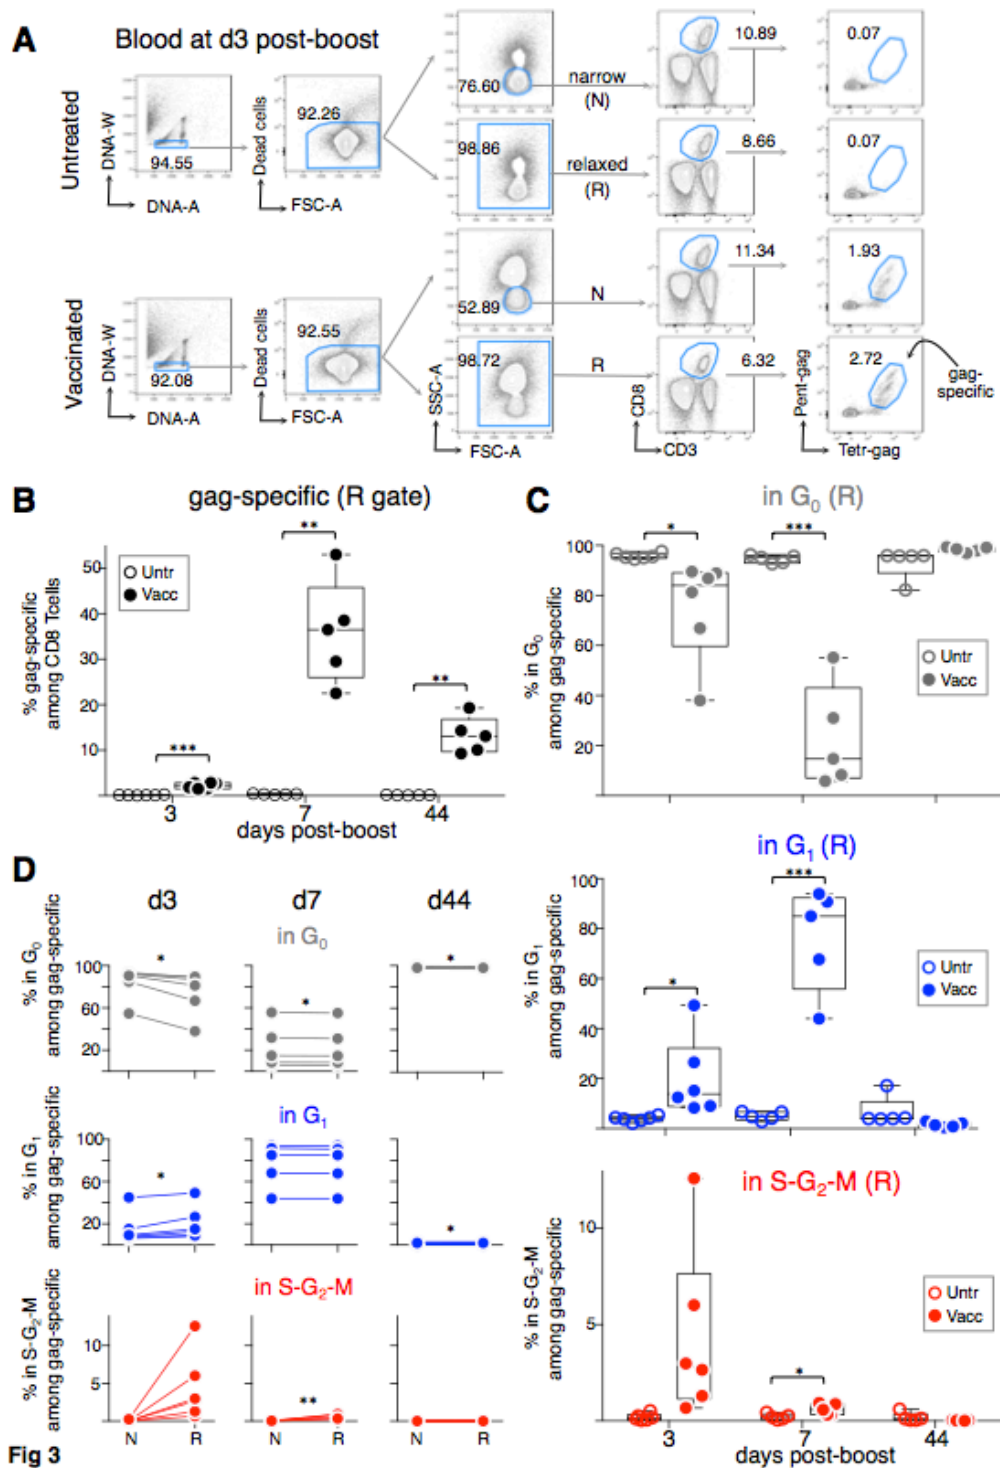

**FIGURE 3. Analysis of the frequency and cell cycle of gag-specific CD8 T cells in the blood of vaccinated mice at d3, d7 and d44 post-boost.**

Female BALB/c mice were vaccinated as in Fig. 1. Blood was obtained from untreated and vaccinated mice at d3, d7 and d44 post-boost and gag-specific CD8 T cells were analyzed in 5 steps as in Fig. 1A and B, using either the N or the R gates at Step 3. (A) Example of flow cytometry analysis of blood cells from untreated and vaccinated mice at d3 post-boost. The numbers represent the percentages of cells in the indicated regions. (B) Summary of gag-specific CD8 T cell frequencies in the blood of untreated and vaccinated mice, obtained using the R gate. (C) Summary of the percentages of gag-specific CD8 T cells in  $G_0$  (top), in  $G_1$  (middle) and in S- $G_2$ -M (bottom) in the blood of vaccinated mice, compared with corresponding percentages among blood CD8 T cells from untreated controls, all obtained using the R gate. (D) Summary of the percentages of blood gag-specific CD8 T cells in  $G_0$  (top), in  $G_1$  (middle) and in S- $G_2$ -M (bottom) at d3, d7, and d44 post-boost, gated using either the N or the R gates as in A (see examples of cell cycle analysis using the R gate in Fig S3.1). The figure summarizes results obtained in 6 prime/boost experiments with a total of 60 mice. In B and C statistically significant differences between vaccinated and untreated mice are indicated at each time of analysis. In D statistically significant differences between N and R are indicated (\* $p \leq 0.05$ ; \*\* $p \leq 0.01$ ; \*\*\* $p \leq 0.001$ ).



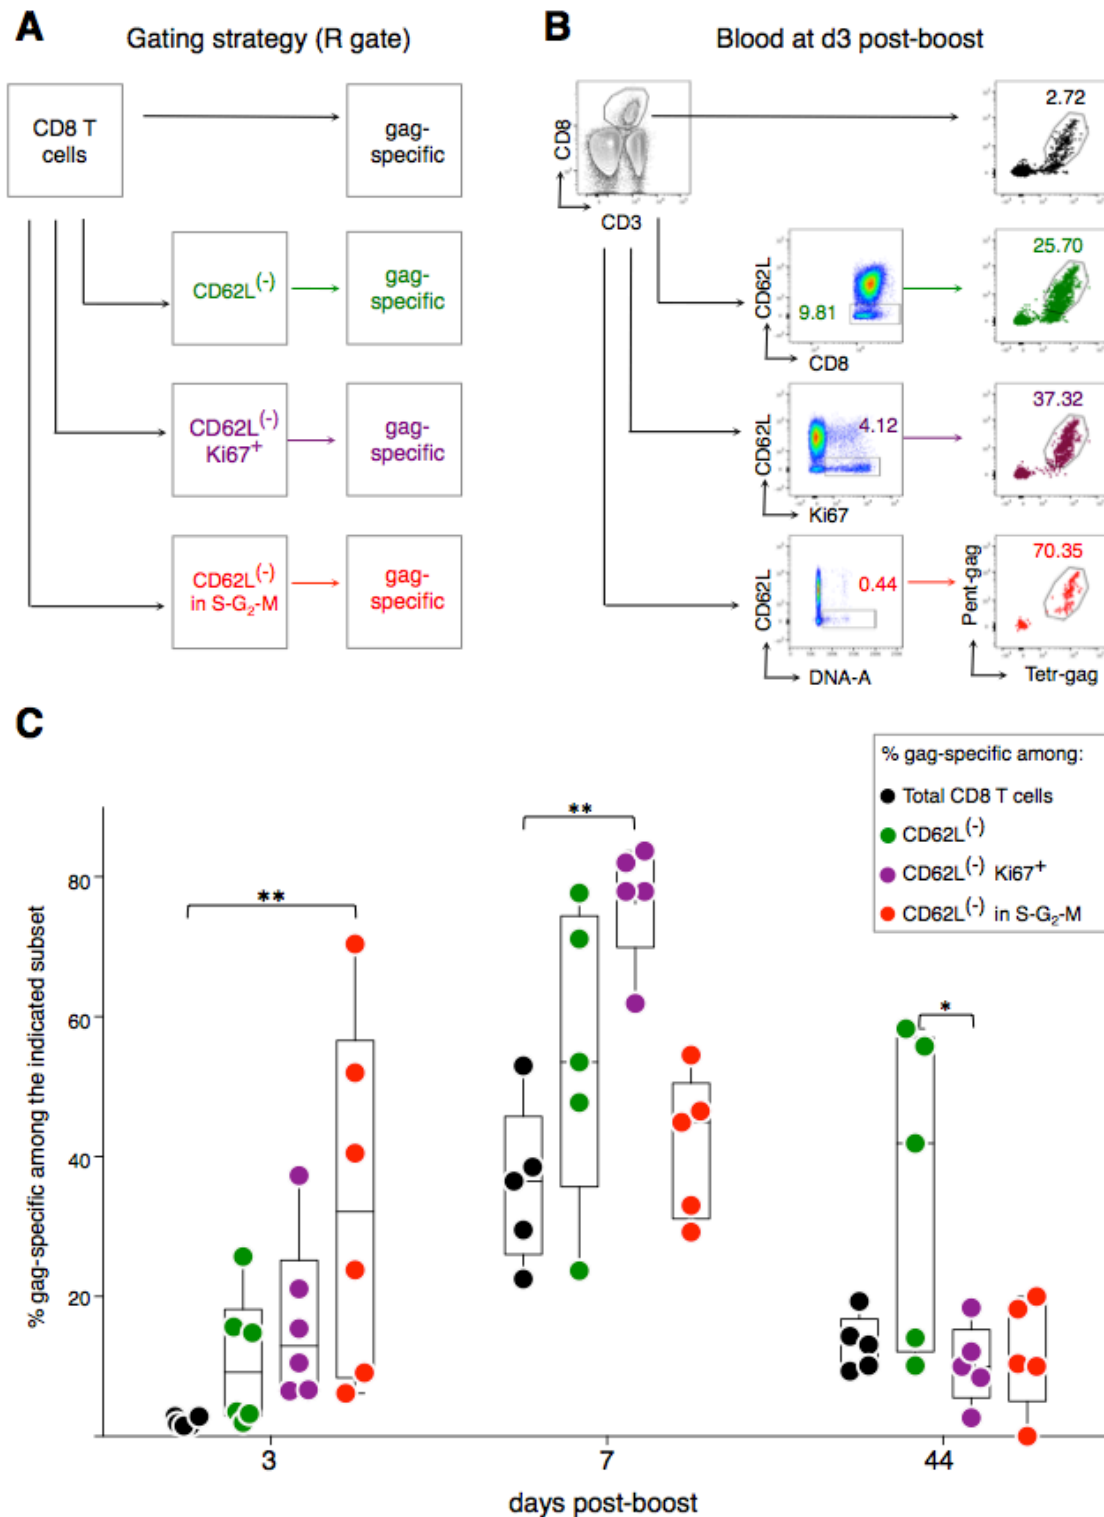

Source: http://biorxiv.org/content/10.1101/391664v1.full.pdf
